# Supplementary material for: Riveting the atomically distributed lithiophilic centers in the CNT-reinforced interfacial layer: an ultrathin, light-weight deposition substrate toward superior Li utilization
Source: Royal Society of Chemistry journal article supplement (doi:10.1039/d1ta04741h), 2021-01-01
Supplement: d1ta04741h1.pdf [file d1ta04741h1.pdf]

## Electronic Supplementary Information

### **Riveting the Atomically Distributed Lithiophilic Centers in the CNT Reinforced Interfacial Layer: An Ultra-thin, Light-weight Deposition Substrate toward Superior Li Utilization**

*Ting Zhao,<sup>‡a</sup> Shaowen Li,<sup>‡a</sup> Yanzhi Wang,<sup>b</sup> Helin Wang,<sup>a</sup> Min Zhang,<sup>a</sup> Xiaoyu Tang,<sup>a</sup> Fu Liu,<sup>a</sup> Dou Du,<sup>\*c</sup> Haoquan Zheng<sup>\*b</sup> and Yue Ma<sup>\*ad</sup>*

<sup>a</sup> State Key Laboratory of Solidification Processing, Center for Nano Energy Materials, School of Materials Science and Engineering, Shaanxi Joint Laboratory of Graphene, Northwestern Polytechnical University, Xi'an 710072, China.

<sup>b</sup> Key Laboratory of Applied Surface and Colloid Chemistry, Ministry of Education, School of Chemistry and Chemical Engineering, Shaanxi Normal University, Xi'an 710119, China.

<sup>c</sup> National Centre for Computational Design and Discovery of Novel Materials (MARVEL), École Polytechnique Fédérale de Lausanne, CH-1015 Lausanne, Switzerland.

<sup>d</sup> Training Center for Engineering Practices, Northwestern Polytechnical University, Xi'an 710072, China

\* E-mail: mayue04@nwpu.edu.cn; zhenghaoquan@snnu.edu.cn; dou.du@epfl.ch

<sup>‡</sup> These authors contributed equally to this work.

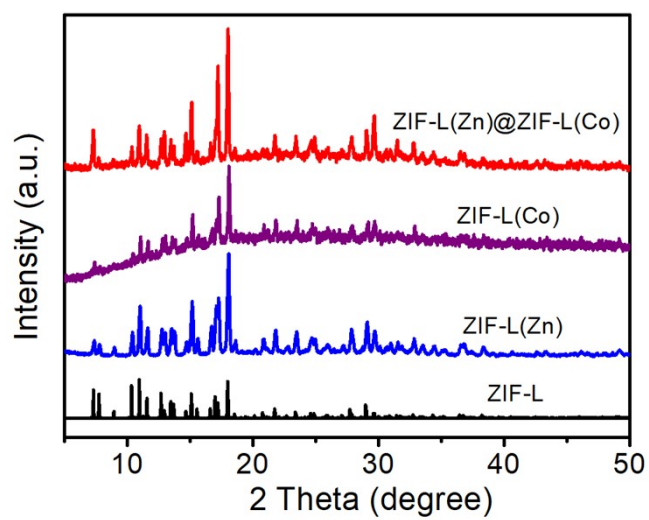

**Fig. S1** XRD pattern of the ZIF-L(Zn)@ZIF-L(Co) precursor.

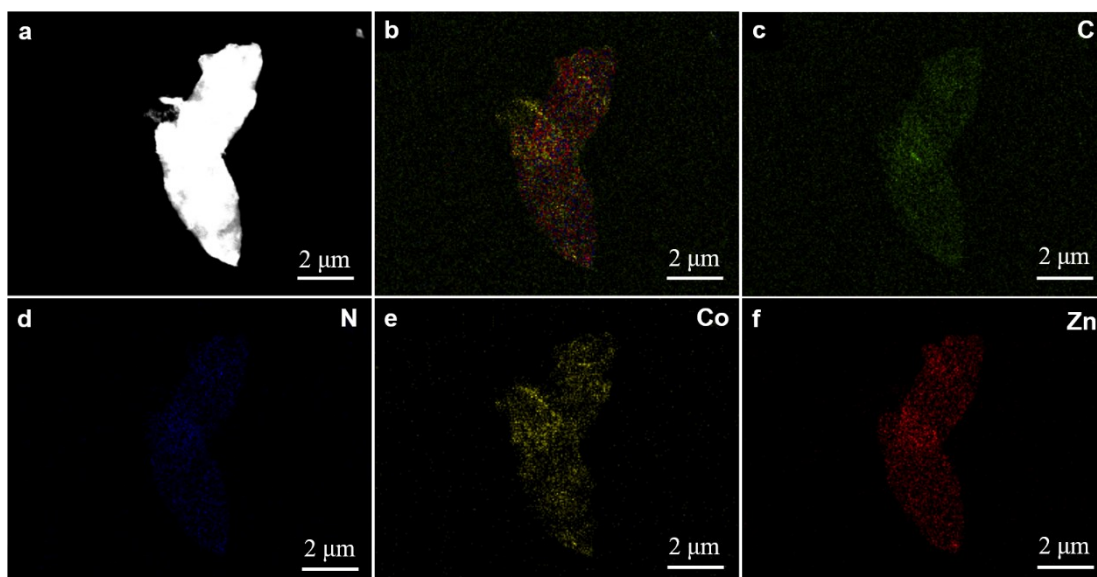

**Fig. S2** SEM image and corresponding EDS elemental maps for the ZIF-L(Zn)@ZIF-L(Co) precursor.

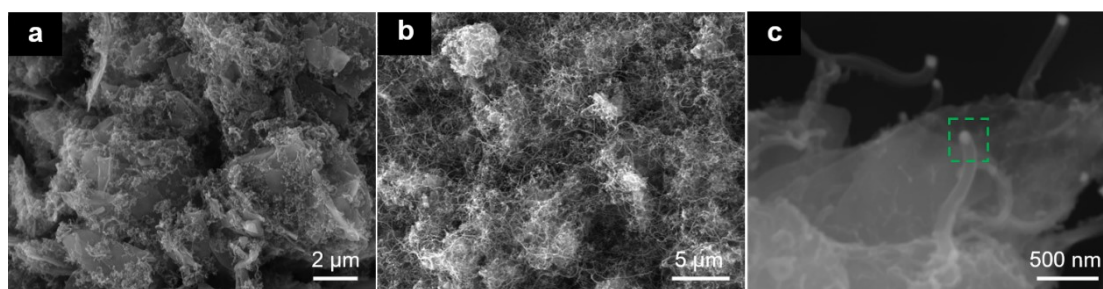

**Fig. S3** SEM images of the Zn-NC-CNT composite at different magnifications. Co was represented in the dotted line in Figure S3c.

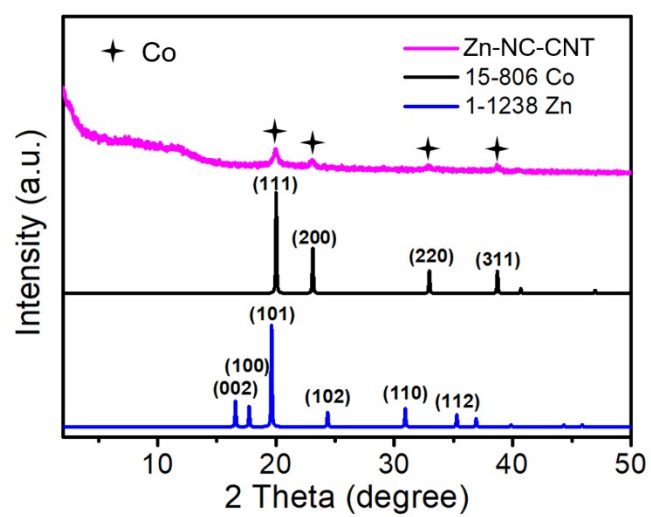

**Fig. S4** XRD pattern of the Zn-NC-CNT composite.

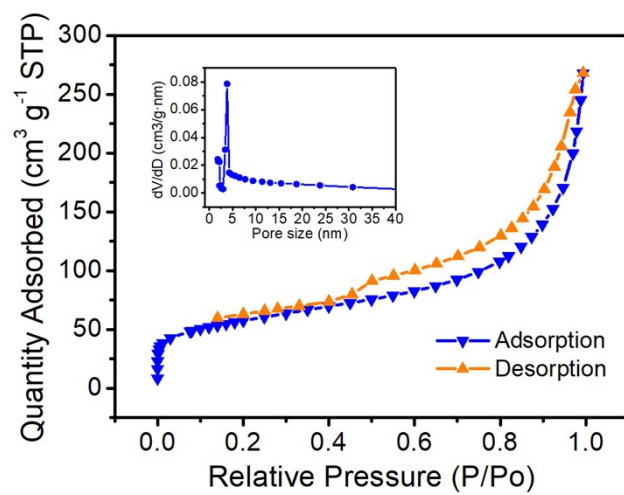

**Fig. S5** Nitrogen adsorption-desorption isotherm and BJH pore size distribution (inset) of the Zn-NC-CNT composite.

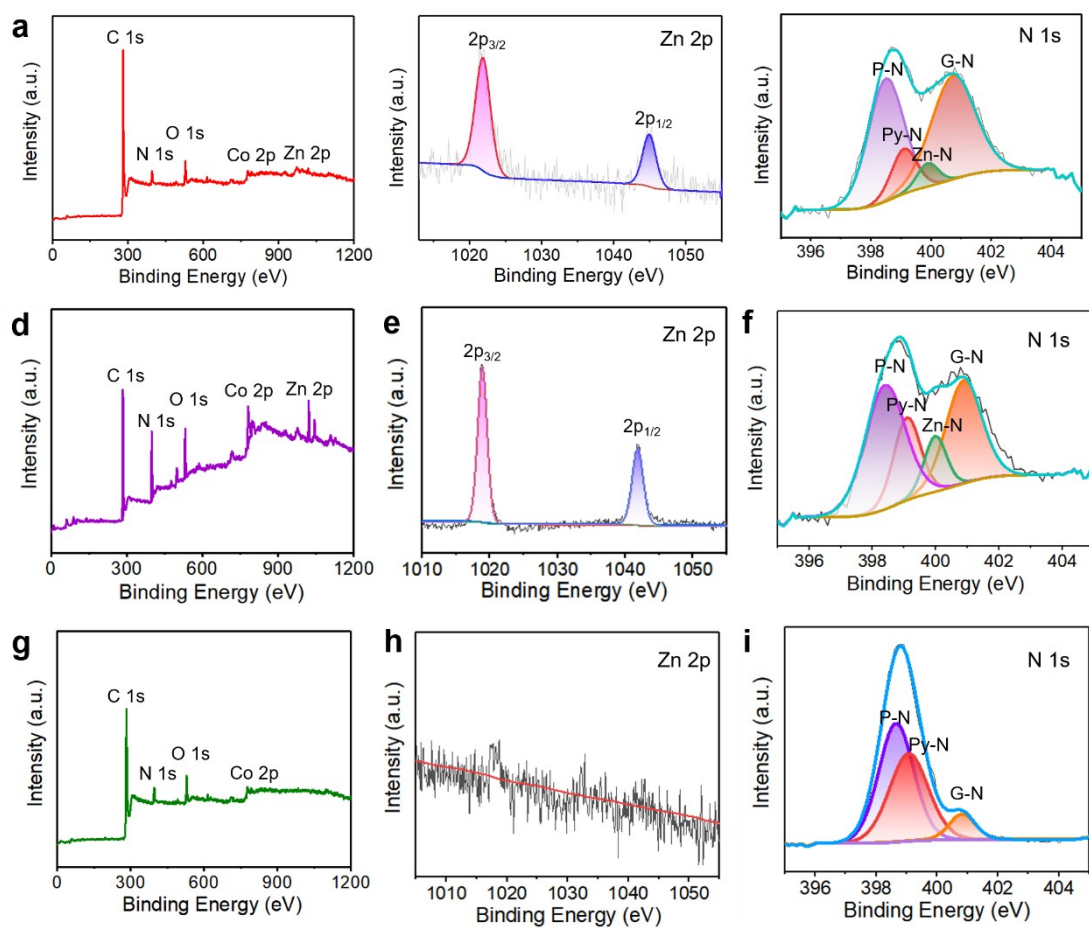

**Fig. S6** (a,b,c) XPS spectra of the Zn-NC-CNT composite. (d,e,f) XPS spectra of the Zn-NC composite. (h,i,j) XPS spectra of the NC-CNT composite. P-N, Py-N, and G-N denote pyridinic N, pyrrolic N, and graphitic N, respectively.

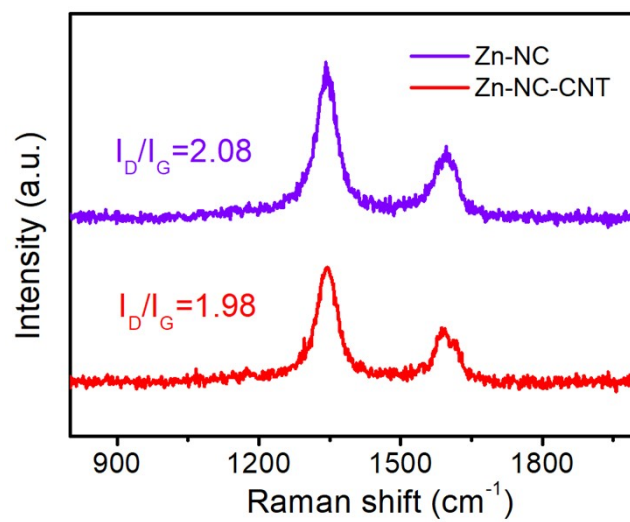

**Fig. S7** Raman spectra of the Zn-NC-CNT and Zn-NC composites.

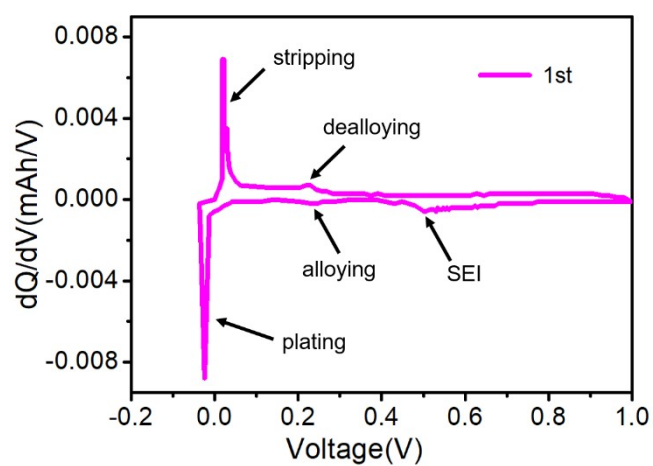

**Fig. S8** The differential capacitance curve of the Zn-NC-CNT-Cu half cell for the first cycle.

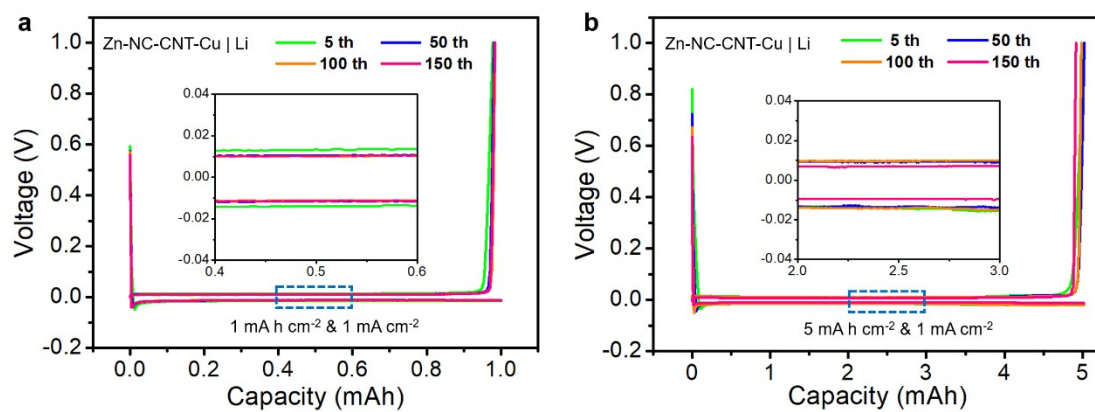

**Fig. S9** Voltage profiles of the different cycles of Zn-NC-CNT-Cu electrode with (a) 1 mA h cm<sup>-2</sup> capacity and (b) 5 mA h cm<sup>-2</sup> capacity.

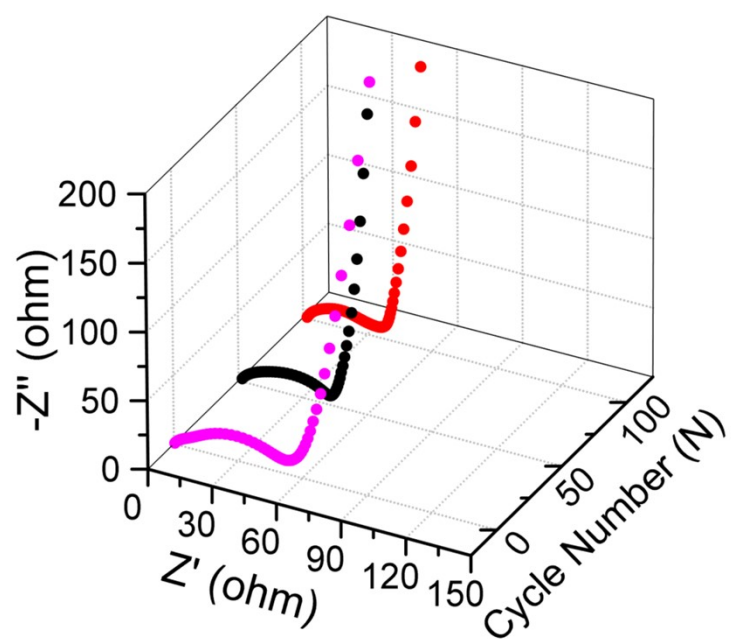

**Fig. S10** Nyquist plots of the impedance spectra of Zn-NC-CNT-Cu symmetric cell before cycling, after 50 cycles and after 100 cycles.

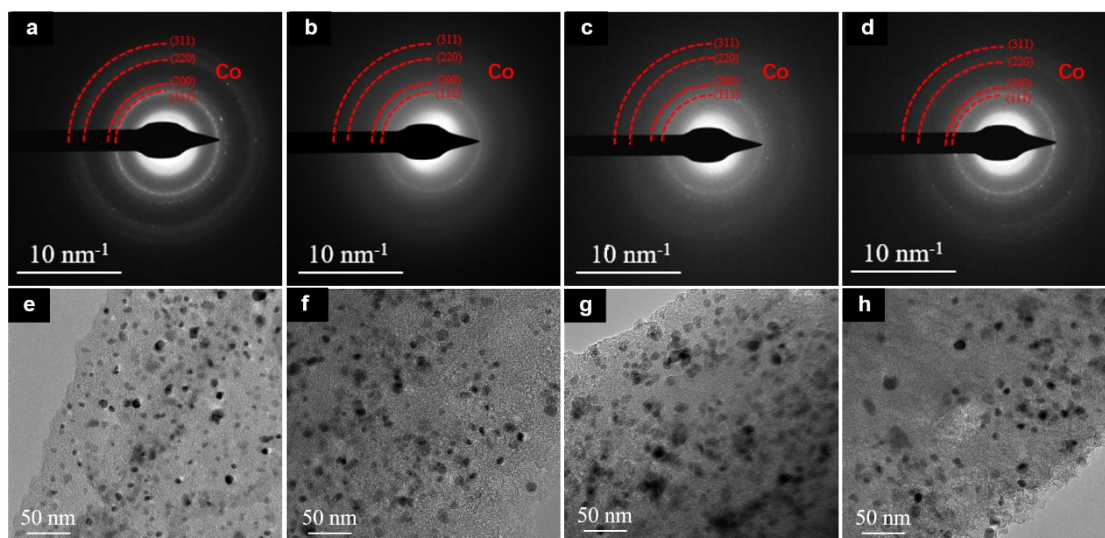

**Fig. S11** (a) SAED and (e) HRTEM images of the Zn-NC-CNT-Cu electrode before cycle. (b) SAED and (f) HRTEM images of the Zn-NC-CNT-Cu electrode after discharge to 0 V. (c) SAED and (g) HRTEM images of the Zn-NC-CNT-Cu electrode after the lithium plating process. (d) SAED and (h) HRTEM images of the Zn-NC-CNT-Cu electrode after the lithium stripping process.

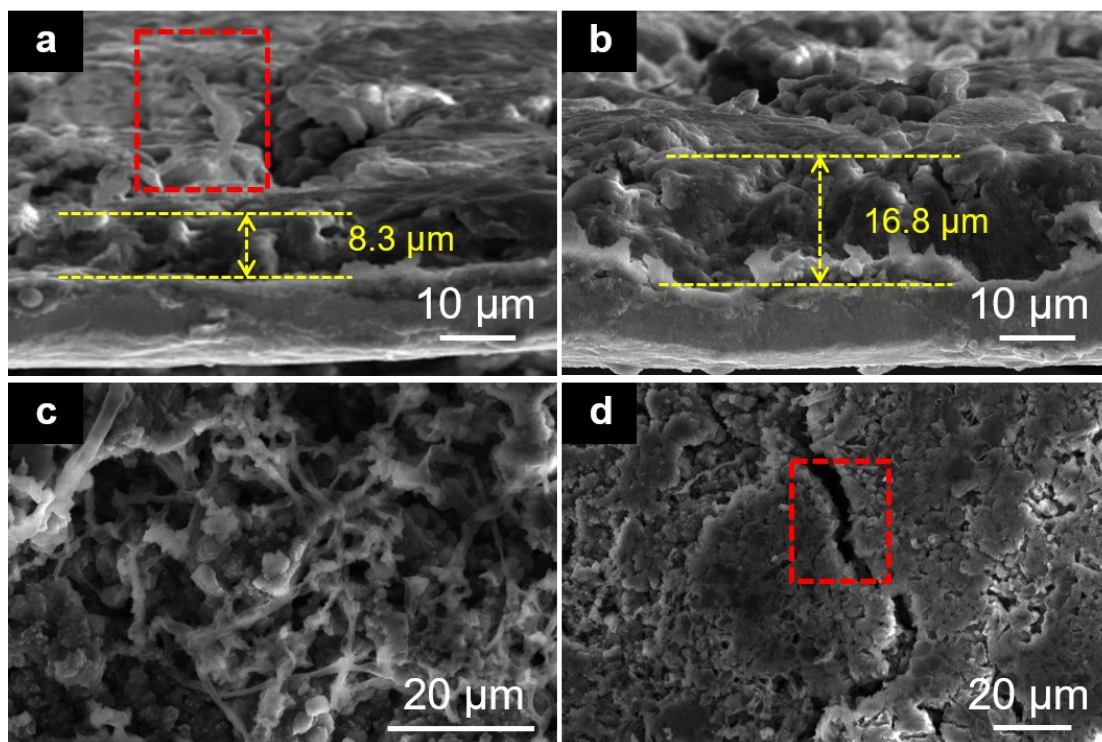

**Fig. S12** (a) Cross section view and (c) top view SEM images of the NC-CNT-Cu electrode after 300 cycles of Li plating/stripping process with a  $1 \text{ mA h cm}^{-2}$  capacity limit. (b) Cross section view and (d) top view SEM images of the Zn-NC-Cu electrode after 300 cycles of Li plating/stripping process with  $1 \text{ mA h cm}^{-2}$  capacity.

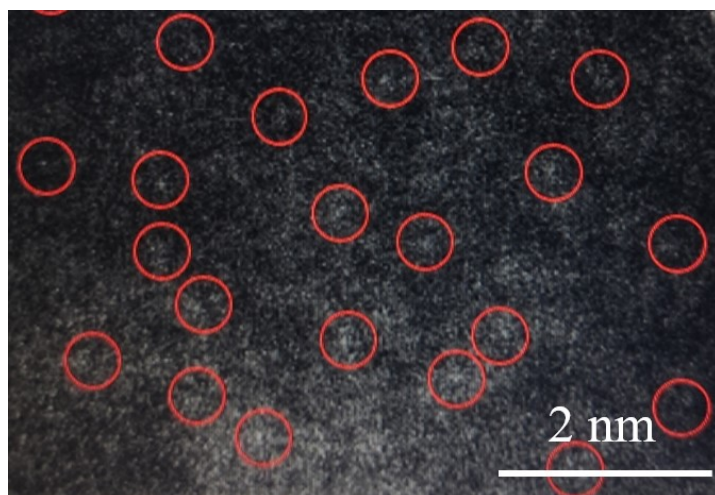

**Fig. S13** Zoom-in HAADF-STEM image of the Zn-NC-CNT-Cu electrode after 300 cycles of Li plating/stripping process, in which the Zn species were highlighted with the red circles.

### Supplementary Note:

The full cell prototype was constructed when pairing the Zn-NC-CNT-Cu (0 excess) with the NMC-811 cathode. The rated capacity was preset as 2 mA h. The mass loading of the Zn-NC-CNT-Cu (0 excess) composite on the copper foil ( $\Phi 12\text{mm}$ ) was measured as 0.25 mg, the mass loading of the NMC-811 cathode on the aluminum foil ( $\Phi 12\text{mm}$ ) was measured as 11.65 mg.

A constant  $k$  (where  $k = \frac{m_p + m_n}{m}$ ), defined as the mass fraction of active materials (*i.e.*, cathode and anode mass divided by total battery mass). The energy density and power density were calculated by below equations:

Energy density ( $\text{Wh kg}^{-1}$ )

$$\begin{aligned} &= k \times \text{specific capacity (mA h g}^{-1}) \times \text{average voltage (V)} \\ &= k \times \frac{\text{capacity of the full cell (mA h)} \times \text{average voltage (V)}}{\text{weight of (anode + cathode)(mg)}} \end{aligned} \quad (1)$$

Power density ( $\text{W kg}^{-1}$ )

$$= \text{Energy density (Wh kg}^{-1}) \times \text{C rate (h}^{-1}) \quad (2)$$

When the energy density of the Zn-NC-CNT-Cu (0 excess)||NMC-811 full cell was calculated based on the loading mass of active materials ( $m_p + m_n = m$ ), the constant  $k$  was 1 (ideal condition), as shown below:

When the current density was increased to 0.5 C, the energy density and power density were 638.8 Wh  $\text{kg}^{-1}$  and 319.39 W  $\text{kg}^{-1}$ .

$$\text{Specific capacity} = \frac{2 \text{ mA h}}{0.25 \text{ mg} + 11.65 \text{ mg}} = 168.1 \text{ mA h g}^{-1}.$$

$$\text{Energy density} = (168.1 \text{ mA h g}^{-1}) \times (3.8 \text{ V}) = 638.8 \text{ Wh kg}^{-1}.$$

$$\text{Power density} = (638.8 \text{ Wh kg}^{-1}) \times (0.5 \text{ h}^{-1}) = 319.4 \text{ W kg}^{-1}.$$

When the current density was increased to 1 C, the energy density and power density were 606.9 Wh kg<sup>-1</sup> and 606.9 W kg<sup>-1</sup>.

$$\text{Specific capacity} = \frac{1.90 \text{ mA h}}{0.25 \text{ mg} + 11.65 \text{ mg}} = 159.7 \text{ mA h g}^{-1}.$$

$$\text{Energy density} = (159.7 \text{ mA h g}^{-1}) \times (3.8 \text{ V}) = 606.9 \text{ Wh kg}^{-1}.$$

$$\text{Power density} = (606.9 \text{ Wh kg}^{-1}) \times (1 \text{ h}^{-1}) = 606.9 \text{ W kg}^{-1}.$$

When the current density was increased to 2 C, the energy density and power density were 581.4 Wh kg<sup>-1</sup> and 1162.8 W kg<sup>-1</sup>.

$$\text{Specific capacity} = \frac{1.82 \text{ mA h}}{0.25 \text{ mg} + 11.65 \text{ mg}} = 153.0 \text{ mA h g}^{-1}.$$

$$\text{Energy density} = (153.0 \text{ mA h g}^{-1}) \times (3.8 \text{ V}) = 581.4 \text{ Wh kg}^{-1}.$$

$$\text{Power density} = (581.4 \text{ Wh kg}^{-1}) \times (2 \text{ h}^{-1}) = 1162.8 \text{ W kg}^{-1}.$$

When the current density was increased to 3 C, the energy density and power density were 555.6 Wh kg<sup>-1</sup> and 1666.8 W kg<sup>-1</sup>.

$$\text{Specific capacity} = \frac{1.74 \text{ mA h}}{0.25 \text{ mg} + 11.65 \text{ mg}} = 146.2 \text{ mA h g}^{-1}.$$

$$\text{Energy density} = (146.2 \text{ mA h g}^{-1}) \times (3.8 \text{ V}) = 555.6 \text{ Wh kg}^{-1}.$$

$$\text{Power density} = (555.6 \text{ Wh kg}^{-1}) \times (3 \text{ h}^{-1}) = 1666.8 \text{ W kg}^{-1}.$$

When the current density was increased to 4 C, the energy density and power density were 530.1 Wh kg<sup>-1</sup> and 319.39 W kg<sup>-1</sup>.

$$\text{Specific capacity} = \frac{1.66 \text{ mA h}}{0.25 \text{ mg} + 11.65 \text{ mg}} = 139.5 \text{ mA h g}^{-1}.$$

$$\text{Energy density} = (139.5 \text{ mA h g}^{-1}) \times (3.8 \text{ V}) = 530.1 \text{ Wh kg}^{-1}.$$

$$\text{Power density} = (530.1 \text{ Wh kg}^{-1}) \times (4 \text{ h}^{-1}) = 2120.4 \text{ W kg}^{-1}.$$

**Table S1.** The calculation results of the specific capacity, energy density and power density of the Zn-NC-CNT-Cu (0 excess)||NMC-811 full cell at different C rates (based on the active materials).

|                              | Zn-NC-CNT-Cu (0 excess)  NMC-811             |                                          |                                        |
|------------------------------|----------------------------------------------|------------------------------------------|----------------------------------------|
| C rate<br>(h <sup>-1</sup> ) | Specific capacity<br>(mA h g <sup>-1</sup> ) | Energy density<br>(Wh kg <sup>-1</sup> ) | Power density<br>(W kg <sup>-1</sup> ) |
| 0.5                          | 168.1                                        | 638.8                                    | 319.4                                  |
| 1                            | 159.7                                        | 606.9                                    | 606.9                                  |
| 2                            | 153.0                                        | 581.4                                    | 1162.8                                 |
| 3                            | 146.2                                        | 555.6                                    | 1666.8                                 |
| 4                            | 139.5                                        | 530.1                                    | 2120.4                                 |

We also calculated the specific capacity, energy density and power density of the Cu||NMC-811 and Li||NMC-811 full cells at different C rates based on the electrode active material, as summarized in Table S2 and S3.

**Table S2.** The calculation results of the specific capacity, energy density and power density of the Cu||NMC-811 full cell at different C rates (based on the active materials).

|                              | Cu  NMC-811                                  |                                          |                                        |
|------------------------------|----------------------------------------------|------------------------------------------|----------------------------------------|
| C rate<br>(h <sup>-1</sup> ) | Specific capacity<br>(mA h g <sup>-1</sup> ) | Energy density<br>(Wh kg <sup>-1</sup> ) | Power density<br>(W kg <sup>-1</sup> ) |
| 0.5                          | 170.9                                        | 649.4                                    | 324.7                                  |
| 1                            | 116.9                                        | 444.2                                    | 444.2                                  |
| 2                            | 75.4                                         | 286.5                                    | 573.0                                  |
| 3                            | 47.1                                         | 179.0                                    | 537.0                                  |
| 4                            | 28.1                                         | 106.8                                    | 427.2                                  |

**Table S3.** The calculation results of the specific capacity, energy density and power density of the Li||NMC-811 full cell at different C rates (based on the active materials).

|                              | Li  NMC-811                                  |                                          |                                        |
|------------------------------|----------------------------------------------|------------------------------------------|----------------------------------------|
| C rate<br>(h <sup>-1</sup> ) | Specific capacity<br>(mA h g <sup>-1</sup> ) | Energy density<br>(Wh kg <sup>-1</sup> ) | Power density<br>(W kg <sup>-1</sup> ) |
| 0.5                          | 140.6                                        | 533.3                                    | 266.7                                  |
| 1                            | 136.8                                        | 520.0                                    | 520.0                                  |
| 2                            | 133.3                                        | 506.6                                    | 1013.3                                 |
| 3                            | 129.8                                        | 493.3                                    | 1480.0                                 |
| 4                            | 126.3                                        | 480.0                                    | 1920.1                                 |

We can use these empirical values (*i.e.*,  $k = 0.45-0.55$ ) to estimate the energy density of the Zn-NC-CNT-Cu (0 excess)||NMC-811 full cell. And we set the parameters  $k$  equal to 0.55, the related results are summarized in Table S4.

**Table S4.** The calculation results of the specific capacity, energy density and power density of the Zn-NC-CNT-Cu (0 excess)||NMC-811 full cell at different C rates (based on the whole mass of the cell for practical battery applications, while  $k = \sim 0.55$ ).

|                               | Zn-NC-CNT-Cu (0 excess)  NMC-811              |                                           |                                         |
|-------------------------------|-----------------------------------------------|-------------------------------------------|-----------------------------------------|
| C rate<br>( $\text{h}^{-1}$ ) | Specific capacity<br>( $\text{mA h g}^{-1}$ ) | Energy density<br>( $\text{Wh kg}^{-1}$ ) | Power density<br>( $\text{W kg}^{-1}$ ) |
| 0.5                           | 168.1                                         | 351.34                                    | 175.67                                  |
| 1                             | 159.7                                         | 333.795                                   | 333.795                                 |
| 2                             | 153.0                                         | 319.77                                    | 639.54                                  |
| 3                             | 146.2                                         | 305.58                                    | 916.74                                  |
| 4                             | 139.5                                         | 291.555                                   | 1166.22                                 |
